# Supplementary material
Source: Springer Nature journal article supplement (https://www.springermedizin.de/resource/supplementary/13256_2010_1553_MOESM2_ESM.pdf/9647940)

**A**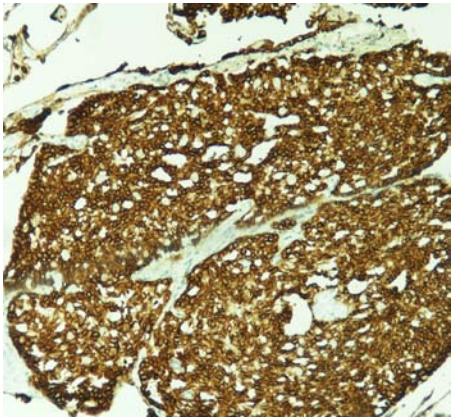**B**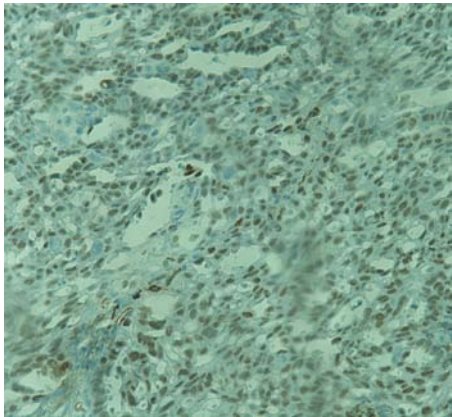

Supplement: MOESM2 [file 9647940]
